# Supplementary material
Source: MDPI journal article supplement (https://www.mdpi.com/1996-1073/14/14/4313)
Supplement: s1 [file s1]

## Supplementary Tables:

**Table S1:** Decision matrices of energy sources

| The opinions of expert N°1 |                |                |                |                |                |                |                |                |                |                 |                 |
|----------------------------|----------------|----------------|----------------|----------------|----------------|----------------|----------------|----------------|----------------|-----------------|-----------------|
| EX <sub>1</sub>            | C <sub>1</sub> | C <sub>2</sub> | C <sub>3</sub> | C <sub>4</sub> | C <sub>5</sub> | C <sub>6</sub> | C <sub>7</sub> | C <sub>8</sub> | C <sub>9</sub> | C <sub>10</sub> | C <sub>11</sub> |
| A <sub>1</sub>             | S              | F              | F              | F              | MW             | MW             | S              | F              | F              | F               | F               |
| A <sub>2</sub>             | MS             | F              | MS             | MS             | F              | F              | MS             | MS             | MS             | AS              | MS              |
| A <sub>3</sub>             | S              | W              | S              | S              | F              | S              | S              | S              | S              | S               | S               |
| A <sub>4</sub>             | F              | MS             | VW             | VS             | S              | F              | S              | W              | W              | W               | W               |
| A <sub>5</sub>             | MS             | S              | S              | S              | MW             | F              | F              | F              | MS             | F               | MS              |
| A <sub>6</sub>             | AS             | AS             | AS             | AW             | AW             | AW             | AW             | AW             | AW             | S               | AS              |
| A <sub>7</sub>             | VS             | VS             | VS             | VW              | VS              |
| A <sub>8</sub>             | VS             | VS             | AS             | F              | AW             | AW             | AW             | AW             | S              | AW              | VS              |
| The opinions of expert N°2 |                |                |                |                |                |                |                |                |                |                 |                 |
| EX <sub>2</sub>            | C <sub>1</sub> | C <sub>2</sub> | C <sub>3</sub> | C <sub>4</sub> | C <sub>5</sub> | C <sub>6</sub> | C <sub>7</sub> | C <sub>8</sub> | C <sub>9</sub> | C <sub>10</sub> | C <sub>11</sub> |
| A <sub>1</sub>             | MS             | F              | MS             | MS             | F              | F              | MS             | MS             | MS             | MS              | MS              |
| A <sub>2</sub>             | F              | MS             | MS             | F              | F              | S              | MS             | MS             | F              | MS              | F               |
| A <sub>3</sub>             | MS             | MW             | S              | F              | S              | VS             | VS             | S              | S              | S               | S               |
| A <sub>4</sub>             | F              | S              | VW             | VW             | F              | S              | S              | W              | VW             | W               | VW              |
| A <sub>5</sub>             | S              | MS             | F              | MS             | F              | F              | F              | MS             | S              | MS              | S               |
| A <sub>6</sub>             | AS             | AS             | AS             | AW              | AS              |
| A <sub>7</sub>             | VS             | VS             | VS             | VW              | VS              |
| A <sub>8</sub>             | S              | VS             | ASF            | AW             | AW             | AW             | F              | MS             | AW             | W               | AS              |
| The opinions of expert N°3 |                |                |                |                |                |                |                |                |                |                 |                 |
| EX <sub>3</sub>            | C <sub>1</sub> | C <sub>2</sub> | C <sub>3</sub> | C <sub>4</sub> | C <sub>5</sub> | C <sub>6</sub> | C <sub>7</sub> | C <sub>8</sub> | C <sub>9</sub> | C <sub>10</sub> | C <sub>11</sub> |
| A <sub>1</sub>             | S              | MS             | MS             | F              | F              | MW             | S              | S              | S              | S               | S               |
| A <sub>2</sub>             | F              | MS             | S              | S              | F              | MS             | S              | VS             | VS             | VS              | VS              |
| A <sub>3</sub>             | S              | MS             | MS             | MS             | S              | S              | VS             | S              | S              | S               | S               |
| A <sub>4</sub>             | F              | MS             | VS             | VS             | S              | S              | MW             | VS             | S              | VS              | S               |
| A <sub>5</sub>             | MS             | MS             | MS             | MW             | F              | MW             | F              | MS             | S              | MS              | S               |
| A <sub>6</sub>             | AS             | AS             | AS             | AW              | AS              |
| A <sub>7</sub>             | VS             | VS             | VS             | VW             | VW             | W              | VW             | F              | VW             | VW              | VS              |
| A <sub>8</sub>             | AS             | VS             | VS             | AW             | AW             | F              | AW             | AW             | F              | AW              | VS              |
| The opinions of expert N°4 |                |                |                |                |                |                |                |                |                |                 |                 |
| EX <sub>4</sub>            | C <sub>1</sub> | C <sub>2</sub> | C <sub>3</sub> | C <sub>4</sub> | C <sub>5</sub> | C <sub>6</sub> | C <sub>7</sub> | C <sub>8</sub> | C <sub>9</sub> | C <sub>10</sub> | C <sub>11</sub> |
| A <sub>1</sub>             | S              | F              | F              | F              | MW             | MW             | S              | F              | F              | F               | F               |
| A <sub>2</sub>             | MS             | F              | MS             | MS             | F              | F              | MS             | MS             | MS             | MS              | MS              |
| A <sub>3</sub>             | S              | W              | S              | S              | F              | S              | S              | S              | S              | S               | S               |
| A <sub>4</sub>             | F              | MS             | VW             | VS             | S              | F              | S              | W              | W              | W               | W               |
| A <sub>5</sub>             | MS             | S              | S              | S              | MW             | F              | F              | F              | MS             | F               | MS              |
| A <sub>6</sub>             | AS             | AS             | AS             | AW              | AS              |
| A <sub>7</sub>             | VS             | VS             | VS             | VW             | VW             | VW             | MW             | VW             | F              | VW              | VS              |
| A <sub>8</sub>             | S              | MS             | VS             | AW             | AW             | F              | AW             | AW             | F              | AW              | AS              |

**Table S2:** Decision opinions of sectors

| The opinions of expert N°1 |                |                |                |                |                |                |                |                |                |                 |                 |
|----------------------------|----------------|----------------|----------------|----------------|----------------|----------------|----------------|----------------|----------------|-----------------|-----------------|
| EX <sub>1</sub>            | C <sub>1</sub> | C <sub>2</sub> | C <sub>3</sub> | C <sub>4</sub> | C <sub>5</sub> | C <sub>6</sub> | C <sub>7</sub> | C <sub>8</sub> | C <sub>9</sub> | C <sub>10</sub> | C <sub>11</sub> |
| S <sub>1</sub>             | AW             | AS             | AW             | F              | W              | F              | AW             | AW             | AS             | AW              | AS              |
| S <sub>2</sub>             | AW             | VW             | F              | F              | S              | MS             | W              | F              | MS             | W               | F               |
| S <sub>3</sub>             | MW             | S              | F              | MW             | F              | F              | AS             | AS             | S              | MW              | VS              |
| S <sub>4</sub>             | AW             | AS             | F              | MS             | AS             | AS             | S              | W              | AW             | AW              | W               |
| S <sub>5</sub>             | AS             | AS             | AS             | AW             | AW             | VW             | AW             | VW             | AW             | VW              | AS              |
| The opinions of expert N°2 |                |                |                |                |                |                |                |                |                |                 |                 |
| EX <sub>2</sub>            | C <sub>1</sub> | C <sub>2</sub> | C <sub>3</sub> | C <sub>4</sub> | C <sub>5</sub> | C <sub>6</sub> | C <sub>7</sub> | C <sub>8</sub> | C <sub>9</sub> | C <sub>10</sub> | C <sub>11</sub> |
| S <sub>1</sub>             | AW             | AS             | AW             | F              | F              | MW             | AW             | AW             | AS             | W               | AS              |
| S <sub>2</sub>             | AW             | MW             | W              | S              | S              | MS             | MW             | VW             | MS             | AW              | F               |
| S <sub>3</sub>             | MW             | S              | F              | MW             | F              | MS             | AS             | AS             | MS             | MW              | S               |
| S <sub>4</sub>             | AW             | AS             | MS             | MS             | VS             | AS             | AW             | W              | AW             | AW              | W               |
| S <sub>5</sub>             | AS             | AS             | AS             | AW             | AW             | W              | AW             | MW             | AW             | VW              | AS              |
| The opinions of expert N°3 |                |                |                |                |                |                |                |                |                |                 |                 |
| EX <sub>3</sub>            | C <sub>1</sub> | C <sub>2</sub> | C <sub>3</sub> | C <sub>4</sub> | C <sub>5</sub> | C <sub>6</sub> | C <sub>7</sub> | C <sub>8</sub> | C <sub>9</sub> | C <sub>10</sub> | C <sub>11</sub> |
| S <sub>1</sub>             | AW             | AS             | AW             | F              | W              | MW             | AW             | AW             | AS             | W               | AS              |
| S <sub>2</sub>             | AW             | VW             | F              | MW             | S              | MS             | AW             | F              | MS             | W               | F               |
| S <sub>3</sub>             | MW             | MS             | S              | MW             | F              | F              | AS             | AS             | MS             | VW              | AS              |
| S <sub>4</sub>             | AW             | AS             | F              | MS             | AS             | AS             | S              | W              | AW             | AW              | W               |
| S <sub>5</sub>             | AS             | AS             | AS             | AW             | AW             | AW             | MS             | S              | MW             | VW              | AS              |
| The opinions of expert N°4 |                |                |                |                |                |                |                |                |                |                 |                 |
| EX <sub>4</sub>            | C <sub>1</sub> | C <sub>2</sub> | C <sub>3</sub> | C <sub>4</sub> | C <sub>5</sub> | C <sub>6</sub> | C <sub>7</sub> | C <sub>8</sub> | C <sub>9</sub> | C <sub>10</sub> | C <sub>11</sub> |
| A <sub>1</sub>             | F              | AS             | AW             | F              | W              | MW             | AW             | AW             | AS             | AS              | AS              |
| A <sub>2</sub>             | AW             | VW             | F              | F              | S              | MS             | W              | F              | MS             | W               | F               |
| A <sub>3</sub>             | AS             | F              | S              | MW             | F              | F              | AS             | AS             | S              | MW              | S               |
| A <sub>4</sub>             | AW             | AS             | F              | MS             | AS             | AS             | S              | W              | AW             | AW              | W               |
| A <sub>8</sub>             | AS             | AS             | AS             | AW             | AW             | VW             | AW             | VW             | AW             | VW              | AS              |

**Table S3:** Aggregate matrix of decision energy sources

|            | A1   |      |      | A2   |      |      | A3   |      |      | A4   |      |      | A5   |      |      | A6   |      |      | A7   |      |      | A8   |      |      |
|------------|------|------|------|------|------|------|------|------|------|------|------|------|------|------|------|------|------|------|------|------|------|------|------|------|
| <b>C1</b>  | 3.72 | 4.73 | 5.00 | 3.46 | 4.47 | 5.00 | 4.73 | 5.73 | 6.44 | 3.00 | 4.00 | 5.00 | 4.23 | 5.23 | 5.44 | 7.00 | 7.00 | 7.00 | 6.00 | 7.00 | 7.00 | 5.69 | 6.48 | 7.00 |
| <b>C2</b>  | 3.22 | 4.23 | 5.00 | 3.46 | 4.47 | 5.00 | 1.68 | 2.78 | 3.41 | 4.23 | 5.23 | 5.44 | 4.47 | 5.48 | 5.92 | 7.00 | 7.00 | 7.00 | 6.00 | 7.00 | 7.00 | 5.42 | 6.44 | 6.44 |
| <b>C3</b>  | 3.46 | 4.47 | 5.00 | 4.23 | 5.23 | 5.44 | 4.73 | 5.73 | 6.44 | 1.57 | 2.74 | 2.74 | 4.16 | 5.18 | 5.92 | 7.00 | 7.00 | 7.00 | 6.00 | 7.00 | 7.00 | 6.32 | 7.00 | 7.00 |
| <b>C4</b>  | 3.22 | 4.23 | 5.00 | 3.94 | 4.95 | 5.44 | 4.16 | 5.18 | 5.92 | 3.83 | 5.12 | 5.12 | 3.76 | 4.82 | 5.21 | 1.00 | 1.00 | 1.00 | 1.00 | 2.00 | 2.00 | 1.32 | 1.41 | 1.50 |
| <b>C5</b>  | 2.45 | 3.46 | 3.87 | 3.00 | 4.00 | 5.00 | 3.87 | 4.90 | 5.92 | 4.40 | 5.42 | 6.44 | 2.45 | 3.46 | 3.87 | 1.00 | 1.00 | 1.00 | 1.00 | 2.00 | 2.00 | 1.00 | 1.00 | 1.00 |
| <b>C6</b>  | 2.21 | 3.22 | 3.41 | 3.66 | 4.68 | 5.44 | 5.23 | 6.24 | 7.00 | 3.87 | 4.90 | 5.92 | 2.71 | 3.72 | 4.40 | 1.00 | 1.00 | 1.00 | 1.00 | 2.00 | 2.21 | 1.73 | 2.00 | 2.24 |
| <b>C7</b>  | 4.73 | 5.73 | 6.44 | 4.23 | 5.23 | 5.44 | 5.48 | 6.48 | 7.00 | 3.98 | 5.05 | 5.66 | 3.00 | 4.00 | 5.00 | 1.00 | 1.00 | 1.00 | 1.19 | 2.21 | 2.21 | 1.32 | 1.41 | 1.50 |
| <b>C8</b>  | 3.66 | 4.68 | 5.44 | 4.43 | 5.44 | 5.44 | 5.00 | 6.00 | 7.00 | 1.57 | 2.74 | 3.71 | 3.46 | 4.47 | 5.00 | 1.00 | 1.00 | 1.00 | 1.32 | 2.38 | 2.51 | 1.41 | 1.50 | 1.50 |
| <b>C9</b>  | 3.66 | 4.68 | 5.44 | 4.12 | 5.14 | 5.44 | 5.00 | 6.00 | 7.00 | 1.50 | 2.63 | 3.35 | 4.47 | 5.48 | 5.92 | 1.00 | 1.00 | 1.00 | 1.32 | 2.38 | 2.51 | 2.59 | 3.13 | 3.64 |
| <b>C10</b> | 3.66 | 4.68 | 5.44 | 5.09 | 5.92 | 5.92 | 5.00 | 6.00 | 7.00 | 1.57 | 2.74 | 3.71 | 3.46 | 4.47 | 5.00 | 1.50 | 1.57 | 1.63 | 1.00 | 2.00 | 2.00 | 1.00 | 1.19 | 1.32 |
| <b>C11</b> | 3.66 | 4.68 | 5.44 | 4.12 | 5.14 | 5.44 | 5.00 | 6.00 | 7.00 | 1.50 | 2.63 | 3.35 | 4.47 | 5.48 | 5.92 | 7.00 | 7.00 | 7.00 | 6.00 | 7.00 | 7.00 | 6.48 | 7.00 | 7.00 |

**Table S4:** Aggregate matrix of decision sectors

|     | A1   |      |      | A2   |      |      | A3   |      |      | A4   |      |      | A5   |      |      |
|-----|------|------|------|------|------|------|------|------|------|------|------|------|------|------|------|
| C1  | 1.32 | 1.41 | 1.50 | 1.00 | 1.00 | 1.00 | 2.74 | 3.71 | 3.71 | 1.00 | 1.00 | 1.00 | 7.00 | 7.00 | 7.00 |
| C2  | 7.00 | 7.00 | 7.00 | 1.19 | 2.21 | 2.21 | 4.16 | 5.18 | 5.92 | 7.00 | 7.00 | 7.00 | 7.00 | 7.00 | 7.00 |
| C3  | 1.00 | 1.00 | 1.00 | 2.28 | 3.36 | 4.40 | 3.87 | 4.90 | 5.92 | 3.22 | 4.23 | 5.00 | 7.00 | 7.00 | 7.00 |
| C4  | 3.00 | 4.00 | 5.00 | 3.08 | 4.12 | 4.79 | 2.00 | 3.00 | 3.00 | 4.00 | 5.00 | 5.00 | 1.00 | 1.00 | 1.00 |
| C5  | 1.32 | 2.38 | 3.41 | 5.00 | 6.00 | 7.00 | 3.00 | 4.00 | 5.00 | 6.74 | 7.00 | 7.00 | 1.00 | 1.00 | 1.00 |
| C6  | 2.21 | 3.22 | 3.41 | 4.00 | 5.00 | 5.00 | 3.22 | 4.23 | 5.00 | 7.00 | 7.00 | 7.00 | 1.00 | 1.68 | 1.86 |
| C7  | 1.00 | 1.00 | 1.00 | 1.19 | 1.86 | 2.28 | 7.00 | 7.00 | 7.00 | 3.34 | 3.83 | 4.30 | 1.41 | 1.50 | 1.50 |
| C8  | 1.00 | 1.00 | 1.00 | 2.28 | 3.36 | 3.98 | 7.00 | 7.00 | 7.00 | 1.00 | 2.00 | 3.00 | 1.78 | 2.91 | 3.03 |
| C9  | 7.00 | 7.00 | 7.00 | 4.00 | 5.00 | 5.00 | 4.47 | 5.48 | 5.92 | 1.00 | 1.00 | 1.00 | 1.19 | 1.32 | 1.32 |
| C10 | 1.63 | 2.30 | 2.82 | 1.00 | 1.68 | 2.28 | 1.68 | 2.71 | 2.71 | 1.00 | 1.00 | 1.00 | 1.00 | 2.00 | 2.00 |
| C11 | 7.00 | 7.00 | 7.00 | 3.00 | 4.00 | 5.00 | 5.69 | 6.48 | 7.00 | 1.00 | 2.00 | 3.00 | 7.00 | 7.00 | 7.00 |
